# Supplementary material
Source: ML conference proceedings conference paper supplement (https://proceedings.neurips.cc/paper_files/paper/2011/hash/2ba8698b79439589fdd2b0f7218d8b07-Abstract.html)
Supplement: Supplementary file [file 2ba8698b79439589fdd2b0f7218d8b07-Supplemental.zip]

## 7 Appendix

### 7.1 Algorithm

We present the detailed algorithm description as Algorithm 2.

---

**Algorithm 2:** Quadratic Approximation method for Sparse Inverse Covariance Learning (*QUIC*)

---

**Input :** Empirical covariance matrix  $S$ , scalar  $\lambda$ , initial  $X_0$ , inner stopping tolerance  $\epsilon$ , parameters  $0 < \sigma < 0.5$ ,  $0 < \beta < 1$

**Output:** Sequence of  $X_t$  converging to  $\arg \min_{X \succ 0} f(X)$ , where  $f(X) = -\log \det X + \text{tr}(SX) + \lambda \|X\|_1$ .

```

1 Compute  $W_0 = X_0^{-1}$ .
2 for  $t = 0, 1, \dots$  do
3    $D = 0, U = 0$ 
4   while not converged do
5     Partition the variables into fixed and free sets:
6      $S_{fixed} := \{(i, j) \mid |\nabla_{ij} g(X_t)| < \lambda - \epsilon \text{ and } (X_t)_{ij} = 0\}, S_{free} := \mathcal{N} \setminus S_{fixed}$ .
7     for  $(i, j) \in S_{free}$  do
8        $a = w_{ij}^2 + w_{ii}w_{jj}$ 
9        $b = s_{ij} - w_{ij} + \mathbf{w}_{\cdot i}^T \mathbf{u}_{\cdot j}$ 
10       $c = x_{ij} + d_{ij}$ 
11       $\mu = -c + \mathcal{S}(c - b/a, \lambda/a)$ 
12       $d_{ij} \leftarrow d_{ij} + \mu$ 
13       $\mathbf{u}_{\cdot i} \leftarrow \mathbf{u}_{\cdot i} + \mu \mathbf{w}_{\cdot j}$ 
14       $\mathbf{u}_{\cdot j} \leftarrow \mathbf{u}_{\cdot j} + \mu \mathbf{w}_{\cdot i}$ 
15    end
16  end
17  for  $\alpha = 1, \beta, \beta^2, \dots$  do
18    Compute the Cholesky factorization  $LL^T = X_t + \alpha D$ .
19    if  $X_t + \alpha D \not\succ 0$  then
20      continue
21    end
22    Compute  $f(X_t + \alpha D)$  from  $L$  and  $X_t + \alpha D$ 
23    if  $f(X_t + \alpha D) \leq f(X_t) + \alpha \sigma [\text{tr}(\nabla g(X_t)D) + \lambda \|X_t + D\|_1 - \lambda \|X_t\|_1]$  then
24      break
25    end
26  end
27   $X_{t+1} = X_t + \alpha D$ 
28  Compute  $W_{t+1} = X_{t+1}^{-1}$  reusing the Cholesky factor.
29 end

```

---

### 7.2 Convergence guarantee (Proof of Theorem 1)

In this section, we prove that Algorithm 2 converges to the global optimum. Our proof is based on the proof in [17], which was developed for coordinate gradient descent methods. [17] considers composite objectives of the form

$$F(\mathbf{x}) = g(\mathbf{x}) + h(\mathbf{x}), \quad (13)$$

where  $g(\mathbf{x})$  is sufficiently smooth (continuously differentiable) and  $h(\mathbf{x})$  is non-differentiable but separable. Recall, that in our case,  $g(X) = -\log \det X + \text{tr}(SX)$  and  $h(X) = \lambda \|X\|_1$ . In [17] it is assumed that  $g(X)$  is smooth over the domain  $\mathbb{R}^n$ . In our case  $g(X)$  is smooth over the restricted domain of the positive definite cone  $S_n^{++}$ . We extend the analysis so that convergence still holds under our setting.

### 7.2.1 Notation

In the following arguments, capital letters such as  $X, \bar{X}, A$  are  $p \times p$  matrices, and  $I$  is the identity matrix.  $f(X)$  is our objective function defined by (2). As is standard [13], the domain of the convex function  $-\log \det$  is extended to  $S^p$  ( $p \times p$  symmetric matrices) by

$$-\log \det X = \begin{cases} -\sum_{i=1}^n \log(\lambda_i(X)), & \text{if } X \succ 0 \\ \infty, & \text{otherwise} \end{cases}$$

where  $\lambda_i(X)$  is the  $i$ th eigenvalue of  $X$ . We use  $\|X\|_2$  to define the induced two norm of a matrix, and  $\|D\|_F$  to denote the 2-norm of  $\text{vec}(D)$ , which is equal to the Frobenius norm of the matrix  $D$ .

We are only dealing with symmetric matrices, and therefore we restrict our attention to the upper triangular indices denoted by  $\mathcal{N} \equiv \{(i, j) \mid 1 \leq i \leq j \leq p\}$ . The matrix function  $g(X)$  can be viewed as an  $\mathbb{R}^{|\mathcal{N}|} \rightarrow \mathbb{R}$  function operating on the vector containing the upper triangular elements of  $X$ . The gradient  $\nabla g(X)$  accordingly becomes an  $\mathbb{R}^{|\mathcal{N}|}$  vector, while the Hessian  $\nabla^2 g(X) = X^{-1} \otimes X^{-1}$  can be represented by an  $\mathbb{R}^{|\mathcal{N}| \times |\mathcal{N}|}$  matrix. We emphasize that we will treat any symmetric matrix as its vectorization of the upper diagonal elements, for example, we will denote  $\text{vec}(D)^T \nabla^2 g(X) \text{vec}(D)$  by  $D^T \nabla^2 g(X) D$ .

For any  $X \succ 0$ , we define

$$D_J(X) \equiv \arg \min_{\substack{D: D_{ij}=0 \\ \forall (i,j) \notin J}} \nabla g(X)^T D + \frac{1}{2} D^T \nabla^2 g(X) D + \lambda \|X + D\|_1, \quad (14)$$

where  $J \subseteq \mathcal{N}$  is any index set, and in particular  $D_{\mathcal{N}}(X)$  takes the minimum over all variables.

We use  $X_1, X_2, \dots$  to denote the sequence of matrices generated by our algorithm, where each  $X_{t+1}$  is updated from  $X_t$  by

$$X_{t+1} = X_t + \alpha_t D_{J_t}(X_t),$$

where  $J_t$  is the index set selected at the  $k$ th iteration, and  $\alpha_t$  is the step size which is the maximum value among  $\{1, \beta, \beta^2, \dots\}$  which satisfies

$$f(X_t + \alpha D_t) < f(X_t) + \alpha \sigma \Delta_t, \quad (15)$$

where  $0.5 > \sigma > 0$  is a constant and

$$\Delta_t \equiv \Delta_{J_t}(X_t) \equiv \nabla g(X_t)^T D_t + \lambda \|X_t + D_t\|_1 - \lambda \|X_t\|_1.$$

We use  $D_t \equiv D_{J_t}(X_t)$  for simplicity.

Following the setting in [17], the index sets  $J_1, J_2, \dots$  need to satisfy

$$\bigcup_{j=0, \dots, T-1} J_{t+j} \supseteq \mathcal{N} \quad \forall t = 1, 2, \dots \quad (16)$$

for some fixed  $T$ . Our algorithm satisfies (16) as mentioned in Section 4.1: we set  $J_1, J_3, \dots$  to be the fixed sets, and  $J_2, J_4, \dots$  to be the free sets and  $T = 3$  will suffice.

### 7.2.2 Lemmas

Our first lemma establishes that our iterates are in the set  $mI \preceq X \preceq MI$  for some positive constants  $m$  and  $M$ .

**Lemma 3.** *The level set  $U = \{X \mid f(X) < f(X_0) \text{ and } X \in S_{++}^p\}$  is contained in the set  $\{X \mid mI \preceq X \preceq MI\}$  for positive constants  $m, M > 0$ .*

*Proof.* First, we prove that  $X \preceq MI$  for all  $X \in U$ . The fact that  $S \succeq 0$  and  $X \succ 0$  implies  $\text{tr}(SX) \geq 0$  and  $\|X\|_1 > 0$ . Therefore we have

$$f(X_0) > f(X) \geq -\log \det X + \lambda \|X\|_1 \quad (17)$$

Since  $\|X\|_2$  is the largest eigenvalue of  $X$ , we have  $-\log \det X \geq -p \log(\|X\|_2)$ . In addition,  $\|X\|_1 \geq \text{tr}(X) \geq \|X\|_2$ . We combine these two facts and (17) to arrive at

$$f(X_0) > -p \log(\|X\|_2) + \lambda \|X\|_2.$$

Since  $-p \log x + \lambda x$  is unbounded as  $x$  increases, there must exist an  $M$  that depends on  $X_0$  such that  $\|X\|_2 \leq M$ .

Next, we prove that  $mI \preceq X$  for all  $X \in U$ . We denote the smallest eigenvalue of  $X$  by  $a$  and use the upper bound on the other eigenvalues to get:

$$f(X_0) > f(X) > -\log \det X \geq -\log a - (p-1) \log M, \quad (18)$$

which shows that  $m = e^{-f(X_0)} M^{-(p-1)}$  is a lower bound for  $a$ .  $\square$

**Lemma 4.** *There exists a unique minimizer  $X^*$  for (2).*

*Proof.* According to Lemma 3, the level set is contained in the compact set  $S = \{X \mid mI \preceq X \preceq MI\}$ , where  $\nabla^2 f(X) = X^{-1} \otimes X^{-1}$ ,  $\nabla^2 f(X) \succeq M^{-2}I$ . From Weierstrass' Theorem, any continuous function in a compact set attains its minimum. In addition,  $f(X)$  is strongly convex in the compact set, so the minimizer  $X^*$  is unique.  $\square$

**Lemma 5.**  *$X^*$  is the optimal solution of (2) if and only if*

$$\text{grad}_{ij}^S f(X^*) = 0 \quad \forall i, j,$$

where the minimum-norm sub-gradient  $\text{grad}_{ij}^S f(X)$  is defined by

$$\text{grad}_{ij}^S f(X) = \begin{cases} \nabla_{ij} g(X) + \lambda & \text{if } X_{ij} > 0, \\ \nabla_{ij} g(X) - \lambda & \text{if } X_{ij} < 0, \\ \text{sign}(\nabla_{ij} g(X)) \max(|\nabla_{ij} g(X)| - \lambda, 0) & \text{if } X_{ij} = 0. \end{cases}$$

*Proof.* The optimality condition for  $f(X)$  is that for all  $(i, j) \in \mathcal{N}$

$$\nabla_{ij} g(X) \begin{cases} = -\lambda & \text{if } X_{ij} > 0, \\ = \lambda & \text{if } X_{ij} < 0, \\ \in [-\lambda, \lambda] & \text{if } X_{ij} = 0. \end{cases} \quad (19)$$

It is easy to prove that (19) holds if and only if  $\text{grad}_{ij}^S f(X) = 0$  for all  $i, j$ . Notice that in our case  $\nabla g(X) = S - X^{-1}$  therefore

$$\text{grad}_{ij}^S f(X) = \begin{cases} (S - X^{-1})_{ij} + \lambda & \text{if } X_{ij} > 0, \\ (S - X^{-1})_{ij} - \lambda & \text{if } X_{ij} < 0, \\ \text{sign}((S - X^{-1})_{ij}) \max(|(S - X^{-1})_{ij}| - \lambda, 0) & \text{if } X_{ij} = 0. \end{cases}$$

$\square$

**Lemma 6.** *For any index set  $J \subseteq \mathcal{N}$ ,  $D_J(X) = 0$  if and only if  $\text{grad}_{ij}^S f(X) = 0$  for all  $(i, j) \in J$ .*

*Proof.*  $D_J(X) = 0$  if and only if  $D = 0$  satisfy the optimality condition of (14). The condition can be written as (19) with  $(i, j) \in J$ . This is the same as (19) for a subset of indexes. Follow the same argument we can prove that this condition is equivalent to  $\text{grad}_{ij}^S f(X) = 0$  for all  $(i, j) \in J$ .  $\square$

**Lemma 7.**  *$\Delta_J(X)$  in the line search condition (15) satisfies*

$$\Delta_J(X) = \nabla g(X)^T D_J(X) + \lambda \|X + D_J(X)\|_1 - \lambda \|X\|_1 \leq -D_J(X)^T \nabla^2 g(X) D_J(X), \quad (20)$$

and consequently,

$$\Delta_J(X) \leq -m \|D_J(X)\|_F^2 \quad (21)$$

*Proof.* For simplicity, and since there can be no confusion, we drop index  $J$ . By definition of  $D$  in (14),  $\forall \alpha \in [0, 1]$ :

$$\nabla g(X)^T D + \frac{1}{2} D^T \nabla^2 g(X) D + \lambda \|X + D\|_1 \leq \nabla g(X)^T (\alpha D) + \frac{1}{2} \alpha^2 D^T \nabla^2 g(X) D + \lambda \|X + \alpha D\|_1. \quad (22)$$

Since  $\|\cdot\|_1$  is a norm, the following holds for all  $\alpha \geq 0$ :

$$\lambda \|X + \alpha D\|_1 = \lambda \|\alpha(X + D) + (1 - \alpha)X\|_1 \leq \lambda \alpha \|X + D\|_1 + \lambda(1 - \alpha) \|X\|_1. \quad (23)$$

Combining (22) and (23) yields:

$$\nabla g(X)^T D + \frac{1}{2} D^T \nabla^2 g(X) D + \lambda \|X + D\|_1 \leq \alpha \nabla g(X)^T D + \frac{1}{2} \alpha^2 D^T \nabla^2 g(X) D + \lambda \alpha \|X + D\|_1 + \lambda(1 - \alpha) \|X\|_1.$$

Therefore

$$(1 - \alpha) \nabla g(X)^T D + (1 - \alpha) \lambda \|X + D\|_1 - (1 - \alpha) \lambda \|X\|_1 + \frac{1}{2} (1 - \alpha^2) D^T \nabla^2 g(X) D \leq 0.$$

Divide both sides by  $1 - \alpha$  to get:

$$\nabla g(X)^T D + \lambda \|X + D\|_1 - \lambda \|X\|_1 + \frac{1}{2} (1 + \alpha) D^T \nabla^2 g(X) D \leq 0.$$

By setting  $\alpha \uparrow 1$ , we have

$$\nabla g(X)^T D + \lambda \|X + D\|_1 - \lambda \|X\|_1 \leq -D^T \nabla^2 g(X) D,$$

which proves (20). Combine with Lemma 3 to get (21).  $\square$

**Lemma 8.** For any convergent subsequence  $X_{s_t} \rightarrow \bar{X}$ ,

$$D_{s_t} \equiv D_{J_{s_t}}(X_{s_t}) \rightarrow 0.$$

*Proof.* The objective value is monotonically decreasing and bounded below, therefore  $f(X_{s_t})$  cannot go to negative infinity, so  $f(X_{s_t}) - f(X_{s_{t+1}}) \rightarrow 0$ . From (15), we have  $\alpha_{s_t} \Delta_{s_t} \rightarrow 0$ .

We proceed to prove by contradiction. If  $D_{s_t}$  does not converge to 0, then there exist an infinite index set  $\mathcal{T} \subseteq \{s_1, s_2, \dots\}$  and  $\delta > 0$  such that  $\|D_t\|_F > \delta$  for all  $t \in \mathcal{T}$ . We will work in this index set  $\mathcal{T}$  in what follows.

Let  $\alpha_t$  denote the line search step size which satisfies (15), by our line search procedure  $\frac{\alpha_t}{\beta}$  will not satisfy (15), so we have:

$$f(X_t + (\frac{\alpha_t}{\beta}) D_t) - f(X_t) \geq \sigma (\frac{\alpha_t}{\beta}) \Delta_t. \quad (24)$$

If  $X_t + \frac{\alpha_t}{\beta} D_t$  is not positive definite, then we define  $f(X_t + \frac{\alpha_t}{\beta} D_t)$  to be  $\infty$ , so (24) still holds. We have

$$\begin{aligned} \sigma \Delta_t &\leq \frac{g(X_t + (\frac{\alpha_t}{\beta}) D_t) - g(X_t) + \lambda \|X_t + \frac{\alpha_t}{\beta} D_t\|_1 - \lambda \|X_t\|_1}{\frac{\alpha_t}{\beta}} \\ &\leq \frac{g(X_t + (\frac{\alpha_t}{\beta}) D_t) - g(X_t) + (\frac{\alpha_t}{\beta}) \lambda \|X_t + D_t\|_1 + (1 - \frac{\alpha_t}{\beta}) \lambda \|X_t\|_1 - \lambda \|X_t\|_1}{\frac{\alpha_t}{\beta}} \quad (\text{by (23)}) \\ &= \frac{g(X_t + (\frac{\alpha_t}{\beta}) D_t) - g(X_t)}{\frac{\alpha_t}{\beta}} + \lambda \|X_t + D_t\|_1 - \lambda \|X_t\|_1, \forall t \in \mathcal{T}. \end{aligned}$$

By the definition of  $\Delta_t$  we can replace the last two terms and get

$$\begin{aligned} \sigma \Delta_t &\leq \frac{g(X_t + (\frac{\alpha_t}{\beta}) D_t) - g(X_t)}{\frac{\alpha_t}{\beta}} + \Delta_t - \nabla g(X_t)^T D_t, \\ (1 - \sigma)(-\Delta_t) &\leq \frac{g(X_t + (\frac{\alpha_t}{\beta}) D_t) - g(X_t)}{\frac{\alpha_t}{\beta}} - \nabla g(X_t)^T D_t \end{aligned}$$

By (21) in Lemma 7,

$$(1 - \sigma)m\|D_t\|_F^2 \leq \frac{g(X_t + (\frac{\alpha_t}{\beta})D_t) - g(X_t)}{\frac{\alpha_t}{\beta}} - \nabla g(X_t)^T D_t$$

$$(1 - \sigma)m\|D_t\|_F \leq \frac{g(X_t + (\frac{\alpha_t}{\beta})\|D_t\|_F \frac{D_t}{\|D_t\|_F}) - g(X_t)}{\|D_t\|_F \frac{\alpha_t}{\beta}} - \nabla g(X_t)^T \frac{D_t}{\|D_t\|_F}.$$

Set  $\hat{\alpha}_t = \frac{\alpha_t}{\beta}\|D_t\|_F$ , and since  $\|D_t\|_F > \delta$  for all  $t \in \mathcal{T}$  we have

$$(1 - \sigma)m\delta \leq \frac{g(X_t + \hat{\alpha}_t \frac{D_t}{\|D_t\|_F}) - g(X_t)}{\hat{\alpha}_t} - \frac{\nabla g(X_t)^T D_t}{\|D_t\|_F}. \quad (25)$$

By (21),

$$-\alpha_t \Delta_t \geq \alpha_t m\|D_t\|_F^2 \geq m\alpha_t\|D_t\|_F \delta,$$

and  $\{\alpha_t \Delta_t\}_t \rightarrow 0$ , so  $\{\alpha_t\|D_t\|_F\}_t \rightarrow 0$ , so  $\{\hat{\alpha}_t\}_t \rightarrow 0$ . Since  $\frac{D_t}{\|D_t\|_F}$  is in the compact 1-norm ball, there exists a subset  $\bar{\mathcal{T}} \subset \mathcal{T}$  such that  $\{\frac{D_t}{\|D_t\|_F}\}_{\bar{\mathcal{T}}} \rightarrow \bar{D}$ , so

$$(1 - \sigma)m\delta \leq \frac{g(X_t + \hat{\alpha}_t \bar{D}) - g(X_t)}{\hat{\alpha}_t} - \nabla g(X_t)^T \bar{D}. \quad (26)$$

Our algorithm guarantees that  $X_t$  is positive definite. Also  $X_t + \hat{\alpha}_t \bar{D}$  is positive definite when  $\hat{\alpha}_t \rightarrow 0$ . So taking limit of (26) as  $t \in \bar{\mathcal{T}}$  and  $k \rightarrow \infty$  on (25), we have

$$(1 - \sigma)m\delta \leq \nabla g(\bar{X})^T \bar{D} - \nabla g(\bar{X})^T \bar{D} = 0,$$

a contradiction, finishing the proof.  $\square$

**Lemma 9.** For any  $X \succ 0$  and symmetric  $D$ , there exists an  $\bar{\alpha} > 0$  such that for all  $\alpha < \bar{\alpha}$ , (1)  $X + \alpha D \succ 0$  and (2)  $X + \alpha D$  satisfies the line search condition (15).

*Proof.* First, when  $\alpha < \sigma_n(X)/\|D\|_2$  ( $\sigma_n(X)$  stands for the smallest eigen-value of  $X$ ),  $\|\alpha D\|_2 < \sigma_n(X)$ , so  $X + \alpha D \succ 0$ .

Second,

$$\begin{aligned} f(X + \alpha D) - f(X) &= g(X + \alpha D) - g(X) + \lambda\|X + \alpha D\|_1 - \lambda\|X\|_1 \\ &\leq g(X + \alpha D) - g(X) + \alpha\lambda(\|X + D\|_1 - \|X\|_1) \text{ by (23)} \\ &= \alpha\Delta + o(\alpha). \end{aligned}$$

It follows that for a fixed  $0 < \sigma < 1$ , when  $\alpha$  is sufficiently small, the line search condition must hold.  $\square$

### 7.2.3 Proof of Lemma 1

Since the *fixed* set  $S_{fixed}$  is defined by

$$S_{fixed} := \{(i, j) \mid |\nabla_{ij} g(X_t)| < \lambda - \epsilon \text{ and } (X_t)_{ij} = 0\},$$

so  $\text{grad}_{ij}^S f(X_t) = 0$  for all  $(i, j) \in S_{fixed}$ . From Lemma 6, this implies  $D_{S_{fixed}} = 0$ , therefore the solution of the following optimization problem is  $\Delta = 0$ :

$$\arg \min_{\Delta} f(X_t + \Delta) \text{ such that } \Delta_{ij} = 0 \quad \forall (i, j) \in S_{free}.$$

### 7.2.4 Main proof

**Theorem 3.** Our algorithm QUIC converges to a unique global optimum.

*Proof.* Assume a subsequence  $\{X_t\}_T$  converges to  $\bar{X}$ . Since the choice of the index set  $J_t$  selected at each step is finite, we can further assume that  $J_t = \bar{J}_0$  for all  $t \in T$ . From Lemma 8,  $D_{\bar{J}_0}(X_t) \rightarrow 0$ . By the continuity of  $\nabla f(X)$  and  $\nabla^2 f(X)$ , it is easy to show  $D_{\bar{J}_0}(X_t) \rightarrow D_{\bar{J}_0}(\bar{X})$ . Therefore  $D_{\bar{J}_0}(\bar{X}) = 0$ .

Furthermore,  $\{D_{\bar{J}_0}(X_t)\}_t \rightarrow 0$  and  $\|X_t - X_{t+1}\|_F \leq \|D_{\bar{J}_0}(X_t)\|_F$ , so  $\{X_{t+1}\}_t$  also converges to  $\bar{X}$ . By further subsetting of  $T$  we can assume that  $J_{t+1} = \bar{J}_1$  for all  $t \in T$ . By the same argument we can prove  $\{D_{J_{t+1}}(X_t)\}_t \rightarrow 0$ , so  $D_{\bar{J}_1}(\bar{X}) = 0$ . Similarly, we can show that  $D_{\bar{J}_i}(\bar{X}) = 0 \forall i = 0, \dots, T-1$  can be assumed for an appropriate subset of  $T$ . According to Lemma 6 and assumption (16),  $\bar{X}$  is a stationary point:

$$\text{grad}_{ij}^S f(\bar{X}) = 0 \forall i, j.$$

Moreover, by Lemma 4, there exists a unique optimal point, so the sequence  $\{X_t\}$  generated by our algorithm must converge to the global optimum.  $\square$

### 7.3 Quadratic Convergence Rate

#### 7.3.1 Existing results for Newton method on Bounded constrain

The convergence rate of Newton method on bounded constrained minimization has been studied in [10] and [6]. Here we briefly mention their results.

Assume we want to solve a constrained minimization problem

$$\min_{x \in \Omega} F(x),$$

where  $\Omega$  is a nonempty subset of  $R^n$  and  $F : R^n \rightarrow R$  has a second derivative  $\nabla^2 F(x)$ . Then beginning from  $x^0$ , a natural extension of Newton method is to compute  $x^{k+1}$  by

$$x^{k+1} = \arg \min_{x \in \Omega} \nabla F(x^k)^T (x - x^k) + \frac{1}{2} (x - x^k)^T \nabla^2 F(x^k) (x - x^k). \quad (27)$$

For simplicity, we assume  $F$  is strictly convex and has a unique minimizer  $x^*$  in  $\Omega$ . Then the following theorem holds

**Theorem 4.** Assume  $F$  is strictly convex, has a unique minimizer  $x_*$  in  $\Omega$ , and  $\nabla^2 F(x)$  is Lipschitz continuous, then for all  $x_0$  sufficiently close to  $x_*$ , the sequence  $\{x_k\}$  generated by (27) converges quadratically to  $x_*$ .

This theorem is proved in [6].

#### 7.3.2 Proof for the quadratic convergence of QUIC

Again we consider the composite objectives as (13), and  $g(X)$  has Lipschitz continuous second order derivatives. Assume  $X^*$  is the optimal solution, then we can divide the indexes into

$$P = \{(i, j) \mid \nabla_{ij} g(X^*) = -\lambda\}, \quad N = \{(i, j) \mid \nabla_{ij} g(X^*) = \lambda\}, \quad Z = \{(i, j) \mid -\lambda < \nabla_{ij} g(X^*) < \lambda\}. \quad (28)$$

Notice that  $X_{ij}^* \geq 0$  for all  $(i, j) \in P$ ,  $X_{ij}^* \leq 0$  for all  $(i, j) \in N$  and  $X_{ij}^* = 0$  for all  $(i, j) \in Z$ .

**Lemma 10.** If the second order derivative of  $g(\cdot)$  is Lipschitz continuous, then when  $X_t$  is close enough to  $X^*$ , the line search condition (15) will be satisfied with step size  $\alpha = 1$ .

*Proof.* To simplify the notation, here we denote  $X_t$  by  $X$ ,  $D_t$  by  $D$ , and  $\Delta_t$  by  $\Delta$ . We bound the decrease in objective function value by the following argument. First, define

$$\tilde{g}(t) = g(X + tD),$$

so  $\tilde{g}''(t) = D^T \nabla^2 g(X + tD) D$ . From the Lipschitz continuity of  $\nabla^2 g(\cdot)$ , we have

$$\|\nabla^2 g(X + tD) - \nabla^2 g(X)\| \leq tL\|D\|,$$

where  $L$  is the Lipschitz constant. By definition

$$|\tilde{g}''(t) - \tilde{g}''(0)| = |D^T (\nabla^2 g(X + tD) - \nabla^2 g(X)) D| \leq tL\|D\|^3.$$

Therefore we can upper bound  $\tilde{g}''(t)$  by

$$\tilde{g}''(t) \leq \tilde{g}''(0) + tL\|D\|^3 = D^T \nabla^2 g(X) D + tL\|D\|^3.$$

Integrate both sides to get

$$\tilde{g}'(t) \leq \tilde{g}'(0) + tD^T \nabla^2 g(X) D + \frac{1}{2}t^2 L\|D\|^3 = \nabla g(X)^T D + tD^T \nabla^2 g(X) D + \frac{1}{2}t^2 L\|D\|^3.$$

Integrating both sides again, we have

$$\tilde{g}(t) \leq \tilde{g}(0) + t\nabla g(X)^T D + \frac{1}{2}t^2 D^T \nabla^2 g(X) D + \frac{1}{6}t^3 L\|D\|^3.$$

Taking  $t = 1$  the inequality becomes

$$\begin{aligned} g(X + D) &= \tilde{g}(1) \leq g(X) + \nabla g(X)^T D + \frac{1}{2}D^T \nabla^2 g(X) D + \frac{1}{6}L\|D\|^3 \\ g(X + D) + \lambda\|X + D\|_1 &\leq g(X) + \lambda\|X\|_1 + (\nabla g(X)^T D + \lambda\|X + D\|_1 - \lambda\|X\|_1) + \frac{1}{2}D^T \nabla^2 g(X) D + \frac{1}{6}L\|D\|^3, \end{aligned}$$

so

$$\begin{aligned} f(X + D) &\leq f(X) + \Delta + \frac{1}{2}D^T \nabla^2 g(X) D + \frac{1}{6}L\|D\|^3 \\ &\leq f(X) + \frac{1}{2}\Delta - \frac{1}{6}\frac{L}{m}\|D\|\Delta \quad (\text{by (20) and (21) in Lemma 7}) \\ &= f(X) + \left(\frac{1}{2} - \frac{1}{6}\frac{L}{m}\|D\|\right)\Delta. \end{aligned}$$

And from Lemma 8 we have  $D^k \rightarrow 0$ , therefore when  $k$  is large enough,  $(\frac{1}{2} - \frac{1}{6}\frac{L}{m}\|D^k\|)$  will be larger than  $\sigma$  ( $0 < \sigma < 0.5$ ), so the line search condition holds with step size 1.  $\square$

**Lemma 11.** Assume that the sequence  $\{X_t\}$  converges to the global optimum  $X^*$ . There exists a  $\bar{t} > 0$  such that

$$(X_t)_{ij} \begin{cases} \geq 0 & \text{if } (i, j) \in P \\ \leq 0 & \text{if } (i, j) \in N \\ = 0 & \text{if } (i, j) \in Z \end{cases} \quad (29)$$

for all  $t > \bar{t}$ .

*Proof.* We prove the case for  $(i, j) \in P$  by contradiction, the other two cases can be handled similarly. Assume that there exists an infinite subsequence  $\{X_{s_t}\}$  such that  $(X_{s_t})_{ij} < 0$ . We consider the update from  $X_{s_t-1}$  to  $X_{s_t}$ . From Lemma 10, we can assume that  $s_t$  is large enough so that the step size equals 1, therefore  $X_{s_t} = X_{s_t-1} + d_{s_t}$ . Note that  $D_{s_t}$  is the optimal solution of

$$\min_D \nabla g(X_{s_t-1})^T D + \frac{1}{2}D^T \nabla^2 g(X_{s_t-1}) D + \|X + D\|_1 - \|X\|_1. \quad (30)$$

Since  $(X_{s_t})_{ij} = (X_{s_t-1})_{ij} + (D_{s_t})_{ij} < 0$ , from the optimality condition of (30) we have

$$(\nabla g(X_{s_t-1}) + \nabla^2 g(X_{s_t-1})(D_{s_t}))_{ij} = \lambda. \quad (31)$$

Since  $D_{s_t}$  converges to 0, (31) implies that  $\{\nabla_{ij} g(X_{s_t-1})\}$  will converge to  $\lambda$ . However, by the definition of  $P$ ,  $\nabla_{ij} g(X^*) = -\lambda$ , and by the continuity of  $\nabla g$  we get that  $\{\nabla_{ij} g(X_t)\}$  converges to  $\nabla_{ij} g(X^*) = -\lambda$ , a contradiction finishing the proof for the case with  $(i, j) \in P$  in (29).  $\square$

**Lemma 12.** Assume  $X_t \rightarrow X^*$ . There exists a  $\bar{t} > 0$  such that variables in  $P$  or  $N$  will not be selected as fixed set (denoted by  $S_{fixed}$ ) after  $t > \bar{t}$ . That is,

$$S_{fixed} \subset Z = \mathcal{N} \setminus (P \cup N).$$

*Proof.* Since  $X_t$  converges to  $X^*$  and  $\nabla g(\cdot)$  is continuous,  $\nabla g(X_t)$  will converge to  $\nabla g(X^*)$ . Therefore,  $\nabla_{ij}g(X_t)$  converges to  $-\lambda$  if  $(i, j) \in P$  and to  $\lambda$  if  $(i, j) \in N$ . Since we select fixed set by testing whether  $(X_t)_{ij} = 0$  and

$$-\lambda + \epsilon < \nabla_{ij}g(X_t) < \lambda - \epsilon,$$

when  $k$  is large enough  $|\nabla_{ij}g(X_t) - \nabla_{ij}g(X^*)|$  will be smaller than  $\epsilon$ , then all variables in  $P$  or  $N$  will not be selected in the fixed set.  $\square$

**Theorem 5.**  $\{X_t\}$  generated by our algorithm QUIC converges asymptotic quadratically to  $X^*$  when  $t$  is large enough.

*Proof.* First, if we the index sets  $P, N$  and  $Z$  (related to the optimal solution) are given, solving (2) is the same as solving the following constrained minimization problem.

$$\begin{aligned} \min_X \quad & -\log \det(X) + \text{tr}(SX) + \sum_{(i,j) \in P} \lambda X_{ij} - \sum_{(i,j) \in N} \lambda X_{ij} \\ \text{s.t.} \quad & X_{ij} \geq 0 \quad \forall (i, j) \in P, \\ & X_{ij} \leq 0 \quad \forall (i, j) \in N, \\ & X_{ij} = 0 \quad \forall (i, j) \in Z. \end{aligned} \tag{32}$$

Next we claim that when  $k$  is large enough, our algorithm is equivalent to applying the Newton method in Section 7.3.1 to minimize (32). Since the objective function values of (32) and (2) are the same if we restrict variables to follow the sign patterns in (32), to prove the equivalence it suffices to show:

1. The sign of the optimal solution for the original sub-problem (5) will always be the same as (32) after a finite number of iterations. This is the result of Lemma 11.
2. The fixed set selection does not affect the Newton sub-problem. This can be proved by Lemma 12 because at each iteration the fixed set  $S_{fixed} \subset Z$ , and  $Z$  is the set which always satisfies  $(D_t)_Z = 0$  after  $t$  large enough. So we will never fix the wrong variables (choose variables in  $P$  or  $N$  in the fixed set) after  $t$  is large enough.

Moreover, Lemma 10 shows the step size will always be 1 when  $t$  large enough. Therefore our algorithm is equivalent to the Newton method in Section 7.3.1, which converges quadratically to the optimal solution of (32). Since the revised problem (32) and our original problem (2) has the same minimum, our algorithm converges quadratically to the optimum of (2) when the iteration  $t$  is large enough.  $\square$

## 7.4 Size of free sets in experiments

In Figure 2, we plot the size of the free set versus iterations for Hereditarybc dataset. Starting from a total of  $1869^2 = 3,493,161$  variables, the size of the free set progressively drops, in fact to less than 120,000 in the very first iteration. We can see the super-linear convergence of QUIC even more clearly when we plot it against the number of iterations.



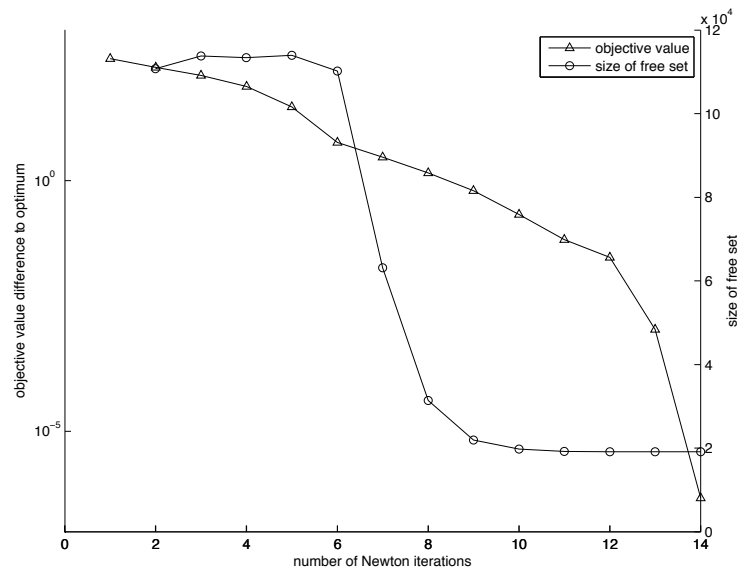

Figure 2: Size of free sets and objective value versus iterations (Hereditarybc dataset). There are total 3,493,161 variables, but the size of free set reduce to less than 120,000 in one iteration, and become about 20,000 at the end.
